# Supplementary material for: Preliminary assessment of genetic variation in the Japanese endemic freshwater crab, Geothelphusadehaani, based on mitochondrial DNA sequences
Source: Biodivers Data J. 2023 Jun 27;11:e97438. doi: 10.3897/BDJ.11.e97438 (PMC10848686; doi:10.3897/BDJ.11.e97438)
Supplement: Supplementary material 2 — Matrix of pairwise differences of FST [file bdj-11-e97438-s002.xlsx]

## Sheet: Sheet1
Suppl. material 2. Matrix of pairwise differences of FST among populations of Geothelphusa dehaani using the combined COI and cytB sequences.
Population	OI	HS	SK1	SK2	TY	AT	SNI	YY	KKO	IE	OS	AK	UN	SN	AF	MF	KUK	YO	KK	IK	MK	YK1	YK2	NK	KCK	TK
OI	0
HS	1	0
SK1	0.91307	0.5082	0
SK2	0.96662	0.6748	-0.215*	0
TY	1	1	0.82482	0.88889	0
AT	1	1	0.90449	0.95732	1	0
SNI	0.94894	0.94611	0.91558	0.92145	0.94441	0.95392	0
YY	0.96631	0.96834	0.90233	0.91549	0.95443	0.97072	0.927	0
KKO	0.89683	0.8008	0.70693	0.71178	0.83432	0.89597	0.92101	0.91244	0
IE	0.97474	0.95937	0.90762	0.92772	0.96022	0.97311	0.95603	0.96534	0.81529	0
OS	0.94957	0.94462	0.89379	0.88109	0.90507	0.94063	0.93182	0.8916	0.91246	0.95383	0
AK	0.98601	0.98347	0.94931	0.95487	0.97048	0.98244	0.96353	0.95819	0.95664	0.98088	0.88293	0
UN	0.90173	0.89277	0.84686	0.8218	0.84007	0.88912	0.9155	0.84491	0.88502	0.92274	0.73178	0.5828	0
SN	1	1	0.97692	0.98907	1	1	0.97494	0.98105	0.97338	0.99134	0.91311	0.9573	0.23367	0
AF	0.84585	0.83509	0.76894	0.72554	0.76982	0.8341	0.88366	0.76449	0.82839	0.88576	0.75206	0.83189	0.76826	0.84566	0
MF	0.97858	0.97574	0.94233	0.94653	0.9622	0.97553	0.9583	0.94547	0.94165	0.97247	0.89557	0.95976	0.8654	0.9775	0.7027	0
KUK	0.93264	0.92389	0.88582	0.86982	0.88474	0.91618	0.93548	0.88713	0.90592	0.93926	0.85733	0.90639	0.85	0.92447	0.71509	0.73209	0
YO	0.90637	0.90483	0.86778	0.85433	0.8749	0.90296	0.91926	0.85776	0.89001	0.9264	0.83117	0.89384	0.83549	0.90846	0.67136	0.62873	0.57852	0
KK	0.94287	0.93132	0.87244	0.85577	0.88508	0.92816	0.93821	0.88372	0.88995	0.94249	0.83333	0.92773	0.83889	0.94747	0.63947	0.87453	0.82137	0.80579	0
IK	0.99428	0.99355	0.97373	0.9821	0.9898	0.99295	0.97308	0.97895	0.96902	0.98727	0.95073	0.982	0.91331	0.99388	0.84321	0.96454	0.90345	0.88109	0.91414	0
MK	1	1	0.97705	0.98857	1	1	0.97602	0.98232	0.97303	0.99133	0.94737	0.98432	0.89816	1	0.79931	0.95151	0.50063	0.76659	0.9311	0.99053	0
YK1	0.97463	0.96899	0.93333	0.92892	0.94755	0.96716	0.95395	0.93958	0.94818	0.97318	0.89609	0.95391	0.87904	0.97037	0.80502	0.93931	0.89057	0.88141	0.88521	0.96879	0.96641	0
YK2	0.97542	0.97028	0.936	0.93175	0.94941	0.96831	0.95604	0.942	0.95015	0.9741	0.89724	0.95354	0.87884	0.97037	0.8119	0.93931	0.89057	0.88141	0.88998	0.96852	0.96641	0.200*	0
NK	0.98504	0.9832	0.96891	0.97237	0.97935	0.98367	0.97252	0.97151	0.97044	0.98331	0.95217	0.97699	0.93128	0.98508	0.89663	0.96752	0.93154	0.92219	0.94626	0.98281	0.98322	0.91301	0.91824	0
KCK	1	1	0.98284	0.99254	1	1	0.97884	0.98702	0.97931	0.993	0.95987	0.98907	0.92012	1	0.87747	0.98166	0.92804	0.91837	0.95361	0.99508	1	0.93761	0.94119	0.64087	0
TK	0.93775	0.93331	0.91185	0.90325	0.91517	0.93302	0.94239	0.91194	0.92265	0.94478	0.89864	0.92456	0.88921	0.93184	0.8381	0.91271	0.89631	0.89296	0.87418	0.93539	0.93009	0.91526	0.91489	0.94506	0.93916	0
Asterisk (*) indicates P>0.05.
